# Supplementary material
Source: PubMed Central journal article supplement (PMC7495375)
Supplement: JVI.00871-20-s0001.pdf [file JVI.00871-20-s0001.pdf]

| Designation     | Sequence 5' to 3'           | Designation                   | Sequence 5' to 3'                           |
|-----------------|-----------------------------|-------------------------------|---------------------------------------------|
| AAV2 VP-K33R-F  | ACCACCACCAAGGCCCGCAGAGC     | AAV2 VP-K142+143R-F           | ACGGCTCCGGGAAGAAGGAGGCCGGT                  |
| AAV2 VP-K33R-R  | CGCTCTGCGGGCCTTGGTGGT       | AAV2 VP-K142+143R-R           | CTCTACCGGCCTCCTTCTCCCGGAG                   |
| AAV2 VP-K39R-F  | AGCGGCATAGGGACGACAGCAG      | AAV2 VP-K161R-F               | TCGGGAACCGGAAGGGCGGGCCA                     |
| AAV2 VP-K39R-R  | TGCTGTCGTCCCTATGCCGCTCT     | AAV2 VP-K161R-R               | TGCTGGCCCGCCTTCCGGTTC                       |
| AAV2 VP-K51R-F  | TTCCTGGGTACAGGTACCTCGGAC    | AAV2 VP-K169R-F               | CAGCCTGCAAGAAGAAGATTGAATT                   |
| AAV2 VP-K51R-R  | AGGGTCCGAGGTACCTGTACCCAG    | AAV2 VP-K169R-R               | CAAAATTCAATCTTCTTCTGCAG                     |
| AAV2 VP-K61R-F  | TCAACGGACTCGACAGGGGAGAGC    | AAV2 VP-K527R-F               | GGCCCGGCCATGGCAAGCCAAGGGACGATGAAGAAAAGTTT   |
| AAV2 VP-K61R-R  | GCTCTCCCTGTGCGAGTCCGTTGA    | AAV2 VP-K527R-R               | AGGAAAAAAGTTTCTTCATCGTCCCTGTGGCTTGCCATGGCCG |
| AAV2 VP-K77R-F  | TCGAGCACGACAGAGCCTACGACC    | AAV2 VP-K532R-F               | CGATGAAGAAAGGTTTTTCTCAGAGC                  |
| AAV2 VP-K77R-R  | CGGTCGTAGGCTCTGTCGTGCT      | AAV2 VP-K532R-R               | TCTGAGGAAAAAACCTTTCTTCATCG                  |
| AAV2 VP-K92R-F  | AACCCGTACCTCAGGTACAACCACG   | AAV2 VP-K549R-F               | CAAGGCTCAGAGAGAACAAATGTGGACATTG             |
| AAV2 VP-K92R-R  | GTGGTTGTACCTGAGGTACGGGT     | AAV2 VP-K549R-R               | TTCAATGTCCACATTTGTCTCTGAGCCTTG              |
| AAV2 VP-K105R-F | AGGAGCGCCTTAGAGAAGATACGTCTT | AAV2, VP2+VP3 (VP1 silence)-F | ATTTAAATCAGGTCCGGCTGCCGATGGTTATCT           |
| AAV2 VP-K105R-R | AAAAGACGTATCTTCTCTAAGGCGCT  | AAV2, VP2+VP3 (VP1 silence)-R | AACCATCGGCAGCCGCACCTGATTTAAATCATT           |
| AAV2 VP-K137R-F | AGGAACCTGTTAGGACGGCTCC      | AAV2, VP1+VP3 (VP2 silence)-F | AGGAACCTGTTAAGACCGCTC                       |
| AAV2 VP-K137R-R | CCCGGAGCCGTCTAACAGGTT       | AAV2, VP1+VP3 (VP2 silence)-R | TTTTCCCGGAGCGGTCTTAAC                       |

**Supplementary table 1. Oligonucleotides for mutagenesis PCR**

| Designation                             | Sequence 5' to 3'                      |
|-----------------------------------------|----------------------------------------|
| AAV2, VP2 only-F                        | AAAGTCGACACGGCTCCGGGAAAAAAG (Sall)     |
| AAV2, VP2 only-R                        | AAAAGCGGCCGCTTACAGATTACGAGTCAGG (NotI) |
| AAV, reporter Gam1-F                    | AAAGCGGCCGCATGGAACAAAACTCATCTC (NotI)  |
| AAV, reporter Gam1-R                    | AAAGCGGCCGCTTACAGAGAATGGTAGGGGT (NotI) |
| qPCR AAV CMV Primer- CMV enhancer-329F  | TGC CCA GTA CAT GAC CTT ATG G          |
| qPCR AAV CMV Primer- CMV enhancer-462R: | GAA ATC CCC GTG AGT CAA ACC            |
| qPCR AAV CMV Probe- CMV enhancer-383T   | 6-FAM AGT CAT CGC TAT TAC CAT GG-MGB   |

**Supplementary table 2. Oligonucleotides for conventional PCR and qPCR Primer/Probe**
